# Supplementary material for: Phase Inversion-Induced Porous Polybenzimidazole Fuel Cell Membranes: An Efficient Architecture for High-Temperature Water-Free Proton Transport
Source: PubMed Central journal article supplement (PMC7407769; doi:10.3390/polym12071604), 2020-07-19
Supplement: polymers-12-01604-s001.pdf [file polymers-12-01604-s001.pdf]

## Supplementary Information

# Phase Inversion-Induced Porous Polybenzimidazole Fuel Cell Membranes: An Efficient Architecture for High-Temperature Water-Free Proton Transport

Sangrae Lee<sup>‡</sup>, Ki-Ho Nam<sup>‡</sup>, Kwangwon Seo, Gunhwi Kim, and Haksoo Han\*

Department of Chemical and Biomolecular Engineering, Yonsei University, 50 Yonsei-ro, Seodaemun-gu, Seoul 120-749, Republic of Korea

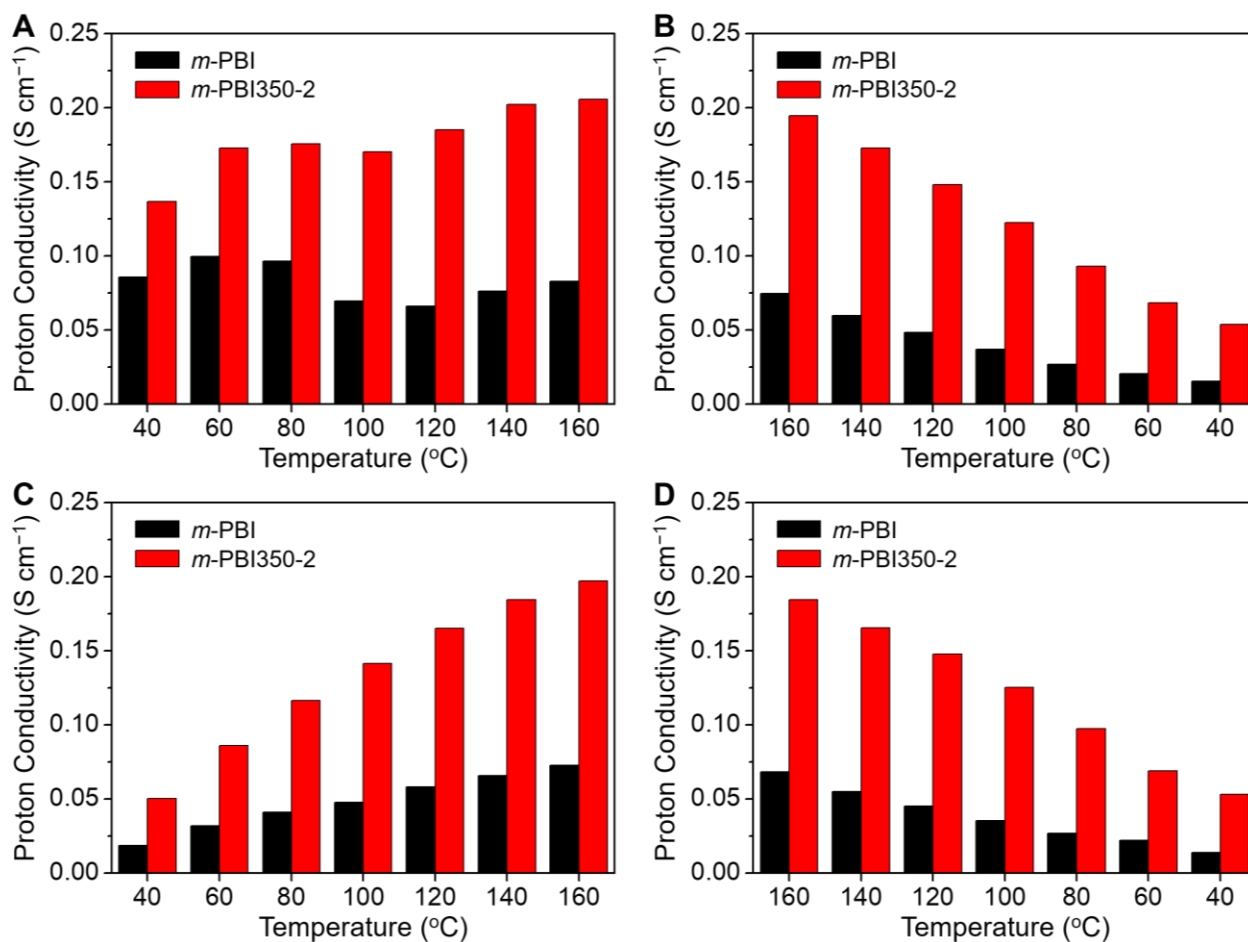

**Figure S1.** Proton conductivity of the *m*-PBI350-2 membranes during four consecutive temperature cycles.

**Table S1.** Comparison of proton conductivity of PBI based membranes

| <b>Ref</b>                                               | <b>Membrane</b>                                       | <b>Proton conductivity<br/>(mS cm<sup>-1</sup>)</b> | <b>Temperature<br/>( °C)</b> | <b>RH<br/>(%)</b> |
|----------------------------------------------------------|-------------------------------------------------------|-----------------------------------------------------|------------------------------|-------------------|
| <i>Int. J. Hydrogen Energy</i> , <b>42</b> , 2636 (2017) | PBI/GO 2 wt%                                          | 129.7                                               | 165                          | Anhydrous         |
| <i>J. Power Sources</i> , <b>401</b> , 149 (2018)        | PBI/CeGdP <sub>2</sub> O <sub>7</sub> /GO<br>32 wt. % | 199                                                 | 180                          | 5                 |
| <i>J. Mater. Chem.</i> , <b>21</b> , 7480 (2011)         | PBI/PBI-MWCNT<br>0.2 wt. %                            | 85                                                  | 160                          | Anhydrous         |
| <i>J. Mater. Chem.</i> , <b>21</b> , 7223 (2011)         | PBI/phosphonated<br>CNT 2.5 wt. %                     | ~120                                                | 160                          | Anhydrous         |
| <i>Nanomaterials</i> , <b>8</b> , 775 (2018)             | PBI/ZIF-mix                                           | 91                                                  | 200                          | Anhydrous         |
| <i>J. Power Sources</i> , <b>276</b> , 62 (2015)         | PBI/BaZrO <sub>3</sub> 4 wt. %                        | 125                                                 | 180                          | 5                 |
| <i>J. Mem. Sci.</i> , <b>383</b> , 78 (2011)             | PBI/Clay 15 wt. %                                     | 120                                                 | 150                          | 12                |
| <i>J. Mater. Chem.</i> , <b>21</b> , 14897 (2011)        | <i>o</i> -PBI/amine<br>modified Si 20<br>wt. %        | 125                                                 | 160                          | Anhydrous         |
| <b>This work</b>                                         | <b>PBI sponge</b>                                     | <b>194</b>                                          | <b>160</b>                   | <b>Anhydrous</b>  |

## References

1. Uregen, N.; Pehlivanoglu, K.; Ozdemir, Y.; Devrim, Y. Development of polybenzimidazole/graphene oxide composite membranes for high temperature PEM fuel cells, *Int. J. Hydrogen Energy* **2017**, 42, 2636–2647. <http://doi.org/10.1016/j.ijhydene.2016.07.009>
2. Singh, B.; Devi, N.; Srivastava, A. K.; Singh, R. K.; Song, S.-J.; Krishnan, N.N.; Konovalova, A.; Henkensmeier, D. High temperature polymer electrolyte membrane fuel cells with Polybenzimidazole-Ce<sub>0.9</sub>Gd<sub>0.1</sub>P<sub>2</sub>O<sub>7</sub> and polybenzimidazole-Ce<sub>0.9</sub>Gd<sub>0.1</sub>P<sub>2</sub>O<sub>7</sub>-graphite oxide composite electrolytes, *J. Power Sources* **2018**, 401, 149–157. <https://doi.org/10.1016/j.jpowsour.2018.08.076>
3. Suryani; Chang, C.-M.; Liu, Y.-L.; Lee, Y. M. Polybenzimidazole membranes modified with polyelectrolyte-functionalized multiwalled carbon nanotubes for proton exchange membrane fuel cells, *J. Mater. Chem.* **2011**, 21, 7480–7486. <https://doi.org/10.1039/c1jm10439j>
4. Kannan, R.; Kagalwala, H. N.; Chaudhari, H. D.; Kharul, U. K.; Kurungot, S.; Pilai, V. K. Improved performance of phosphonated carbon nanotube–polybenzimidazole composite membranes in proton exchange membrane fuel cells, *J. Mater. Chem.* **2011**, 21, 7223–7231. <https://doi.org/10.1039/c0jm04265j>
5. Escorihuela, J.; Sahuquillo, O.; Garcia-Bernabe, A.; Gimenez, E.; Compan, V. Phosphoric Acid Doped Polybenzimidazole (PBI)/Zeolitic Imidazolate Framework Composite Membranes with Significantly Enhanced Proton Conductivity under Low Humidity Conditions, *Nanomaterials* **2018**, 8, 775. <https://doi.org/10.3390/nano8100775>
6. Hooshyari, K.; Javanbakht, M.; Shabanikia, A.; Enhessari, M. Fabrication BaZrO<sub>3</sub>/PBI-based nanocomposite as a new proton conducting membrane for high temperature proton exchange membrane fuel cells, *J. Power Sources* **2015**, 276, 62–72. <http://doi.org/10.1016/j.jpowsour.2014.11.083>
7. Plackett, D.; Siu, A.; Li, Q.; Pan, C.; Jensen, J. O.; Nielson, S. F.; Permyakova, A. A.; Bjerrum, N. J. High-temperature proton exchange membranes based on polybenzimidazole and clay composites for fuel cells, *J. Mem. Sci.* **2011**, 383, 78–87. <https://doi.org/10.1016/j.memsci.2011.08.038>
8. Ghosh, S.; Maity, S.; Jana, T. Polybenzimidazole/silica nanocomposites: Organic-inorganic hybrid membranes for PEM fuel cell, *J. Mater. Chem.* **2011**, 21, 14897–14906. <https://doi.org/10.1039/c1jm12169c>
